# Supplementary material for: Bioconjugation strategy for cell surface labelling with gold nanostructures designed for highly localized pH measurement
Source: PubMed Central journal article supplement (PMC6290020; doi:10.1038/s41467-018-07726-5), 2018-12-11
Supplement: 41467_2018_7726_MOESM2_ESM.pdf [file 41467_2018_7726_MOESM2_ESM.pdf]

## Supplementary information

### **Bioconjugation strategy for cell surface labelling with gold nanostructures designed for highly localized pH measurement**

Leonardo Puppulin<sup>1</sup>, Shigekuni Hosogi<sup>1,2</sup>, Hongxin Sun<sup>3</sup>, Kazuhiko Matsuo<sup>4</sup>, Toshio Inui<sup>5,6</sup>,  
Yasuaki Kumamoto<sup>7</sup>, Toshinobu Suzaki<sup>8</sup>, Hideo Tanaka<sup>7</sup> and Yoshinori Marunaka<sup>1, 5,9</sup>

<sup>1</sup>*Department of Molecular Cell Physiology, Graduate School of Medical Science, Kyoto Prefectural University of Medicine, Kajii-cho, Kawaramachi-Hirokoji, Kyoto 602-8566, Japan*

<sup>2</sup>*Department of Clinical and Translational Physiology, Kyoto Pharmaceutical University, 5 Nakauchi-cho, Misasagi, Yamashina-ku, Kyoto 607-8414, Japan*

<sup>3</sup>*College of Pharmaceutical Sciences, Ritsumeikan University, 1-1-1 Nojihigashi, Kusatsu, Shiga, 525-8577, Japan*

<sup>4</sup>*Department of Anatomy and Developmental Biology, Graduate School of Medical Science, Kyoto Prefectural University of Medicine, Kajii-cho, Kawaramachi-Hirokoji, Kyoto 602-8566, Japan*

<sup>5</sup>*Research Center for Drug Discovery and Pharmaceutical Development Science, Research Organization of Science and Technology, Ritsumeikan University, Kusatsu 525-8577, Japan*

<sup>6</sup>*Saisei Mirai Clinics, Moriguchi, 3-34-8 Okubocho, Moriguchi-shi, Osaka 570-0012, Japan*

<sup>7</sup>*Department of Pathology and Cell Regulation, Graduate School of Medical Science, Kyoto Prefectural University of Medicine, Kajii-cho, Kawaramachi-Hirokoji, Kyoto 602-8566, Japan*

<sup>8</sup>*Department of Biology, Graduate School of Science, Kobe University, 1-1 Rokkodai-cho, Nada-ku, Kobe 657-8501, Japan*

<sup>9</sup>*Research Institute for Clinical Physiology, Kyoto Industrial Health Association, 67 Kitatsuboi-cho, Nishino-kyo, Nakagyo-ku, Kyoto 604-8472, Japan*

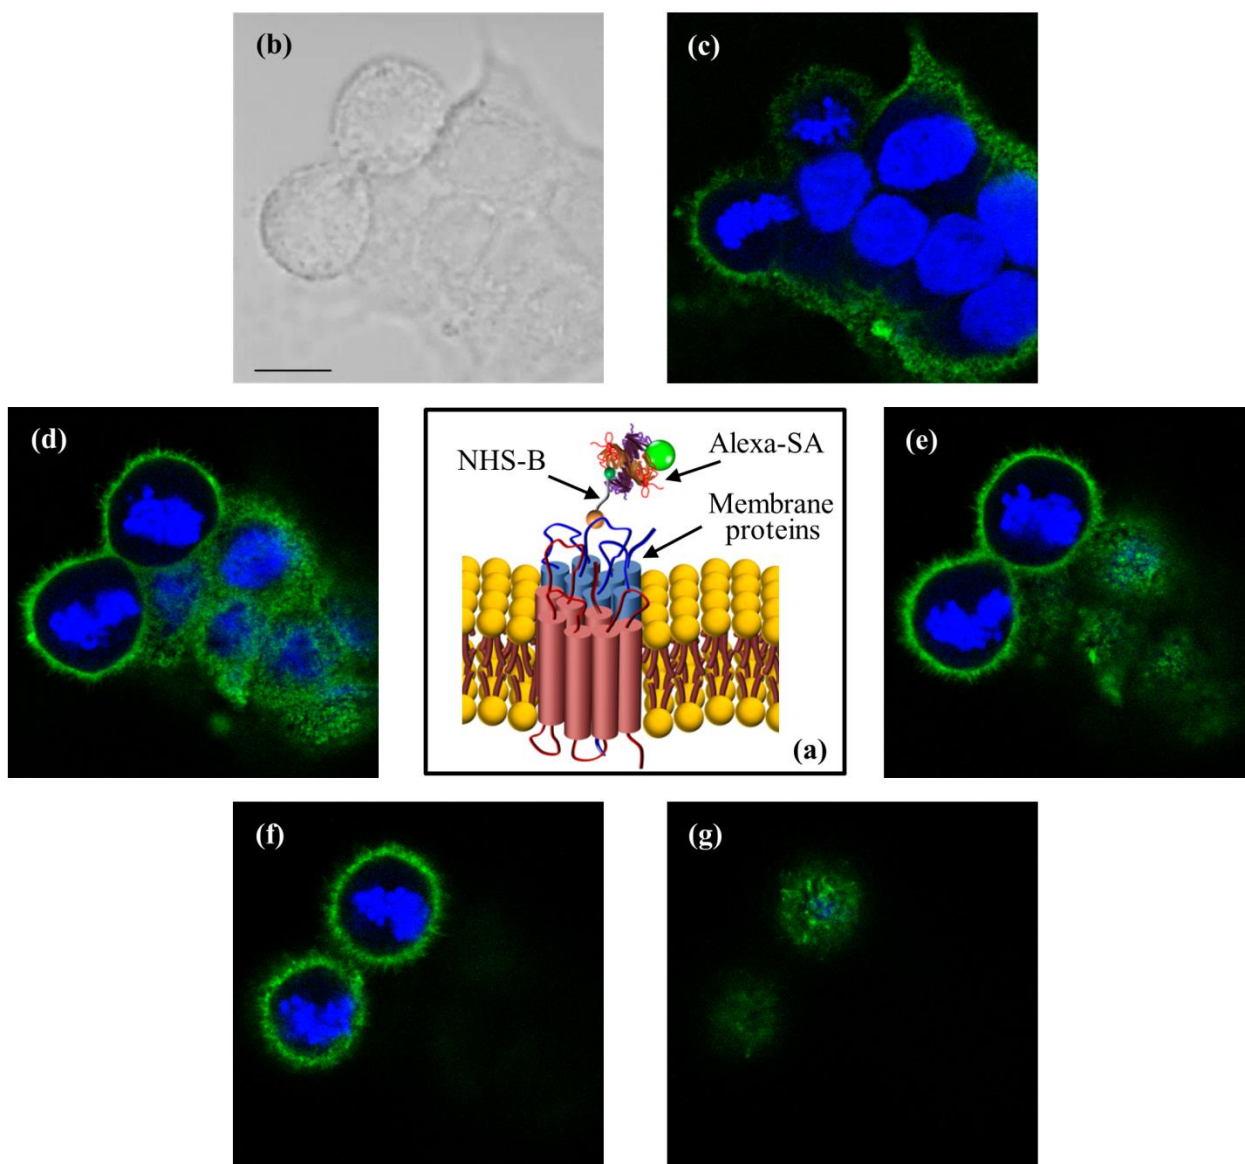

### Supplementary Figure 1: Confirmation of cell surface labelling by NHS-B.

CFM analysis was performed on MKN28 cells after treatment in isotonic buffer solution at pH 8 with NHS-B functionalized with Alexa-SA, as shown in the sketch of (a). The confocal fluorescence images collected from the cell cluster in (b) are shown at different positions of the focal plane:  $z = 3 \mu\text{m}$  (c),  $6 \mu\text{m}$  (d),  $10 \mu\text{m}$  (e),  $13 \mu\text{m}$  (f) and  $18 \mu\text{m}$  (g) ( $z = 0$  is the position of the glass bottom dish). In Supplementary Movie 2, we combined the collected images to create a movie of the  $z$ -stack sections through the cells. Scale bar:  $10 \mu\text{m}$ .

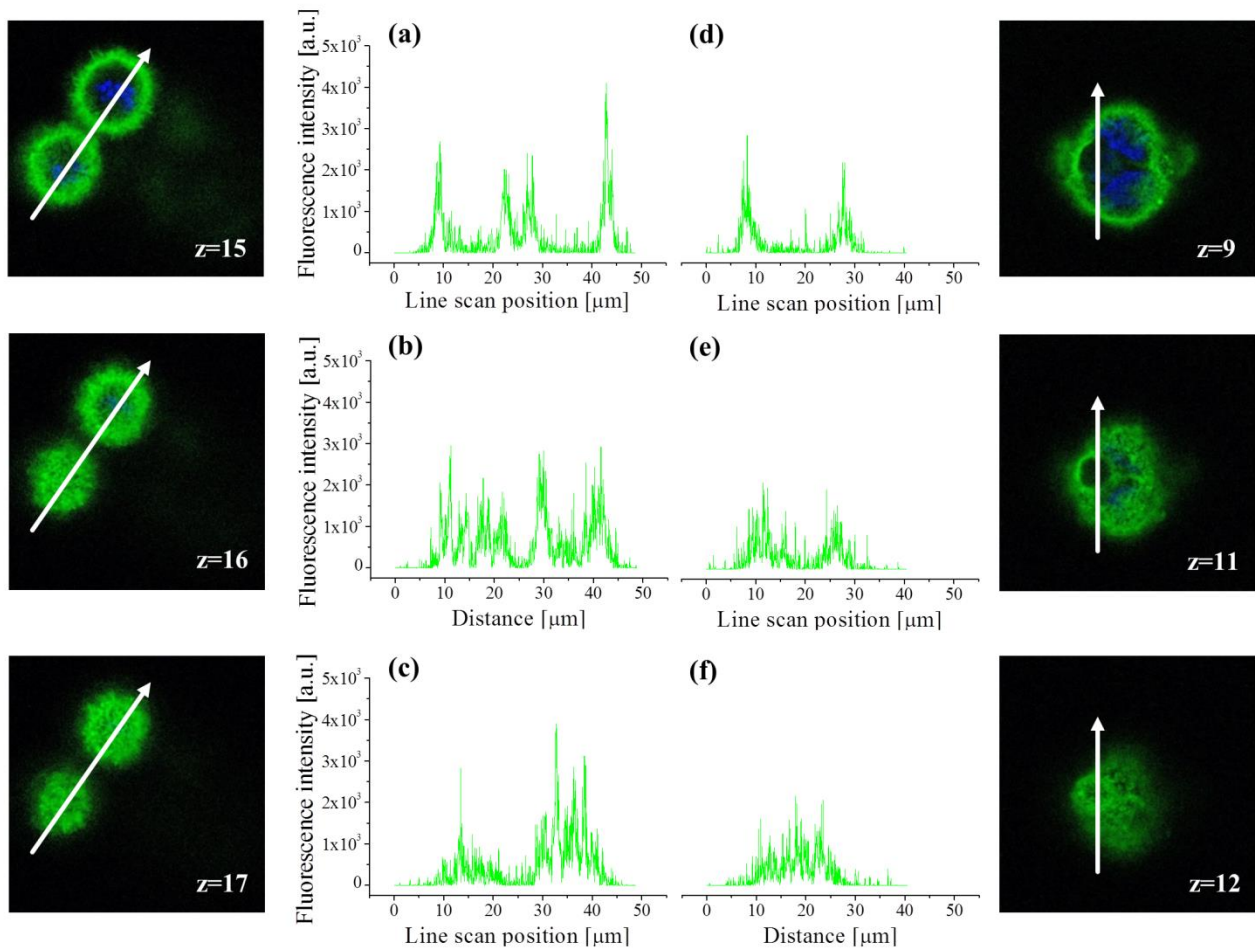

**Supplementary Figure 2: Buffer solution pH effect on the yield of membrane protein biotinylation.**

CFM analysis was carried out on cells treated with Alexa-SA/NHS-B in isotonic buffer solution at different pH. From each reported image, we calculated representative fluorescence intensity profiles from in-plane line scans, which are depicted with white arrows. In (a)-(c) are shown the intensity plots obtained from the fluorescence images on the left, which were collected on cells treated at pH = 8.0 at different  $z$ -position of the focal plane ( $z = 0$  is the position of the glass bottom dish). The length of the arrows is 50  $\mu\text{m}$ . Similarly, (d)-(f) report results from a cluster of cells treated at pH = 7.6 (fluorescence images on the right, length of the arrows: 40  $\mu\text{m}$ ).

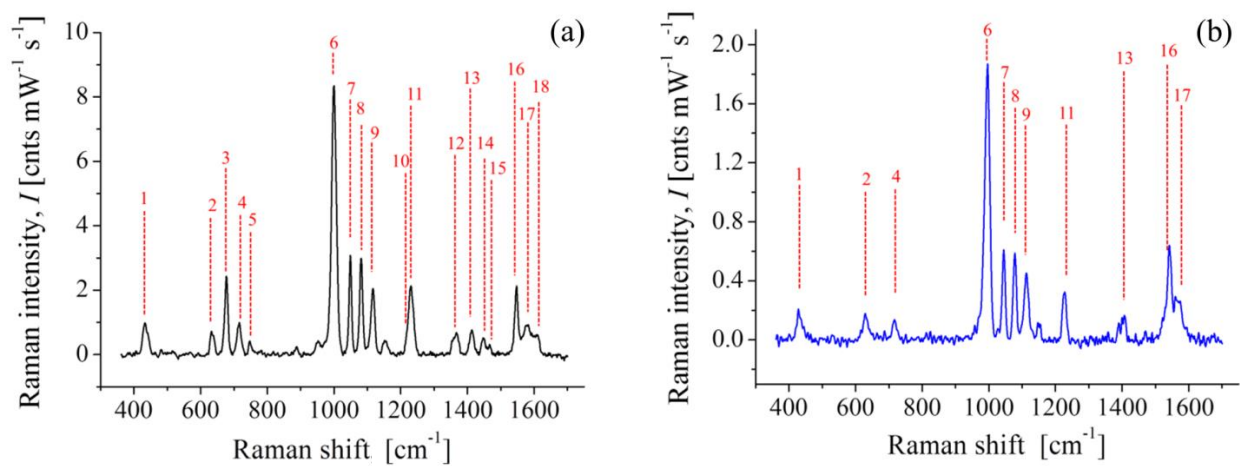

**Supplementary Figure 3: Comparison between spectral features of HPDP-B and 2-Py.**

Typical SERS spectra of HPDP-B (a) and 2-Py thiolate (b) collected from AuNP colloidal solutions after conjugation. The assignments of the labelled bands are reported in *Supplementary Table 1*.

| Band number | SERS band position [cm <sup>-1</sup> ] | Band assignment                               | Reference |
|-------------|----------------------------------------|-----------------------------------------------|-----------|
| 1           | 436                                    | $\beta$ (CCC), $\delta$ (C-S) - 2Py           | [1]       |
| 2           | 636                                    | 6a, $\gamma$ (CCC) - 2Py                      | [1]       |
| 3           | 680                                    | $\nu$ (C-S) - BH                              | [4]       |
| 4           | 717                                    | $\nu$ (C-S) - 2Py                             | [1]       |
| 5           | 747                                    | $\nu$ (C-S) - BH                              | [4]       |
| 6           | 1001                                   | 1a, Ring breathing - 2Py                      | [1],[2]   |
| 7           | 1051                                   | 18a, $\beta$ (C-H) - 2Py                      | [1], [2]  |
| 8           | 1081                                   | 18b, $\delta$ (C-H) - 2Py                     | [1]       |
| 9           | 1116                                   | 12a, Ring breathing/ $\nu$ (C-S) - 2Py        | [1],[2]   |
| 10          | 1220                                   | Ureido ring+ $\delta$ (CH <sub>2</sub> ) - BH | [3]       |
| 11          | 1229                                   | $\gamma$ (NH)/ $\delta$ (NH) - 2Py            | [1]       |
| 12          | 1367                                   | $\delta_{\omega}$ (CH <sub>2</sub> ) - BH     | [5]       |
| 13          | 1414                                   | 19b, $\nu$ (C=C)/ $\nu$ (C=N) - 2Py           | [1]       |
| 14          | 1448                                   | $\delta_s$ (CH <sub>2</sub> ) - BH            | [3]       |
| 15          | 1466                                   | $\delta_s$ (CH <sub>2</sub> ) - BH            | [3]       |
| 16          | 1546                                   | 8b, $\nu$ (C=C) - 2Py                         | [1],[2]   |
| 17          | 1579                                   | 8a, $\nu$ (C=C) - 2Py                         | [1]       |
| 18          | 1609                                   | $\delta_s$ (CH <sub>2</sub> ) - BH            | [3]       |

$\gamma$ =out-of-plane deformation;  $\beta$ = deformation;  $\nu$ =stretching;  $\delta_{\omega}$ =wagging;  $\delta_s$ =scissoring; 2Py=2-pyridine thiolate; BH=biotin-hexyl spacer arm thiolate

**Supplementary Table 1:** Band assignments of the spectra in Supplementary Figure 3.

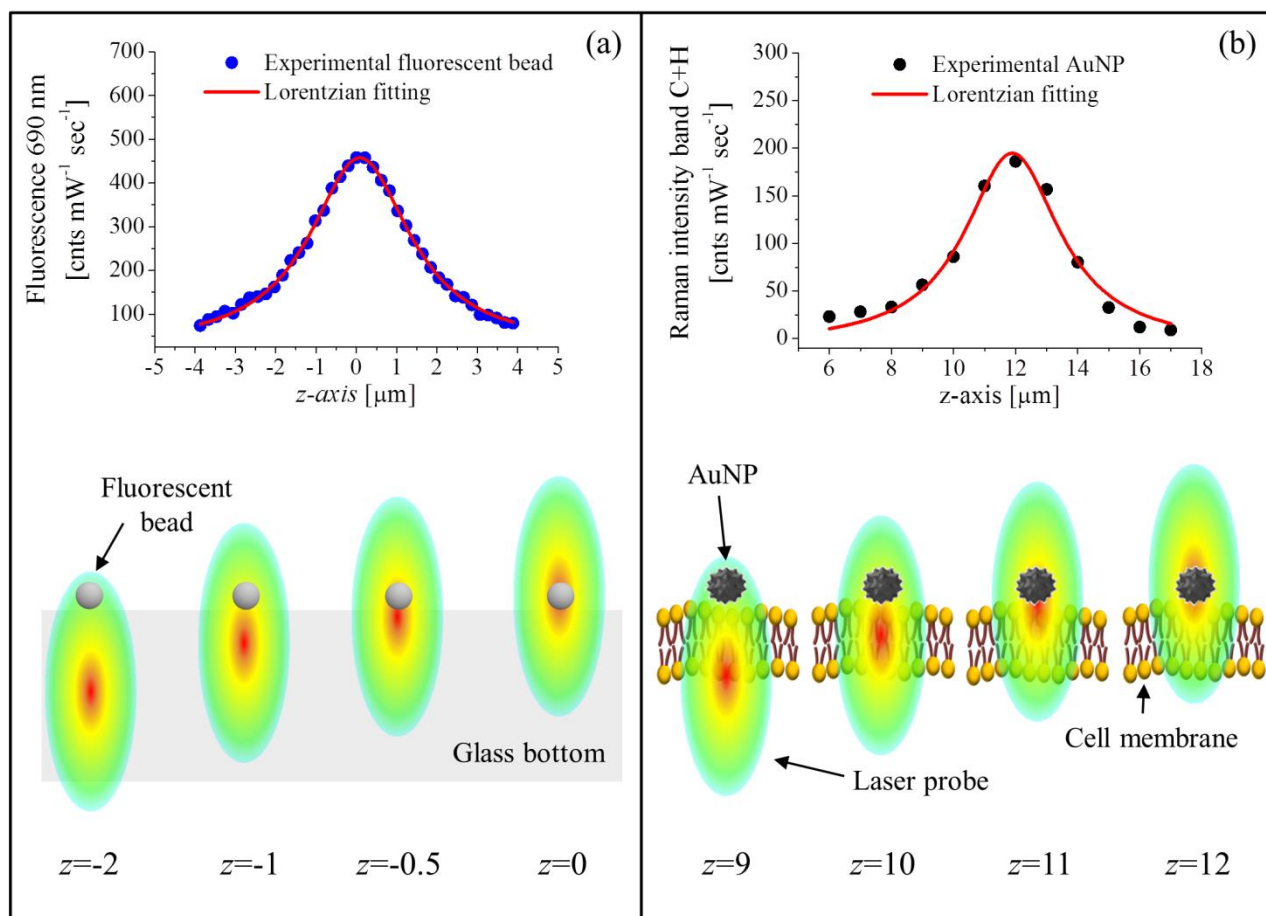

**Supplementary Figure 4: Axial resolution of the laser probe estimated using fluorescence spectroscopy and SERS.**

Fluorescence (a) and SERS (b) intensities profiles were obtained from  $z$ -axis line scans through one 50 nm fluorescent bead attached to the glass substrate and through the AuNP of Fig. 8 in the manuscript, respectively. The experimental trends were fitted using Lorentzian function describing the intensity axial profile of the laser probe. The FWHM estimated from the data in (a) was 3.1  $\mu\text{m}$ , while in (b) was 3.8  $\mu\text{m}$ .

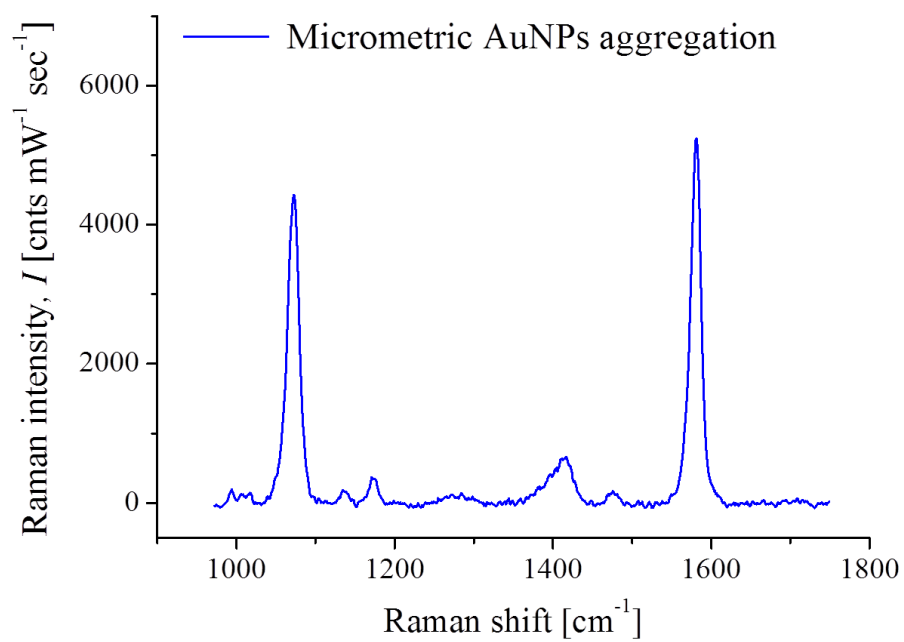

**Supplementary Figure 5: Typical SERS spectrum collected from microscopic aggregations.**

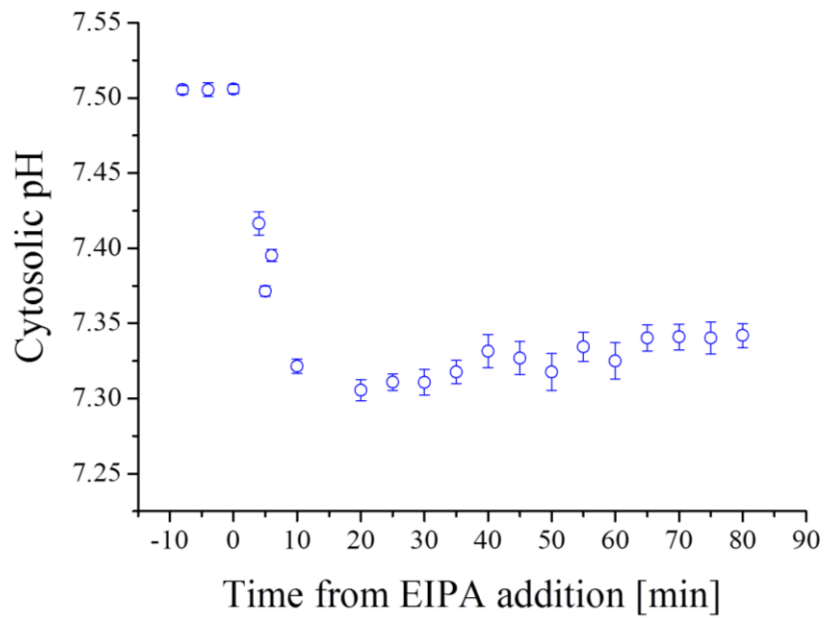

**Supplementary Figure 6: Effect of EIPA on the average cytosolic pH measured in MKN28 cells.**

Cytosolic pH was measured by fluorescence spectroscopy after internalization of a pH-sensitive dye. Measurements were collected at different time before and after addition of EIPA (error bars show the standard deviation from the mean of  $n = 4$  measurements). Source data are provided as a Source Data file.



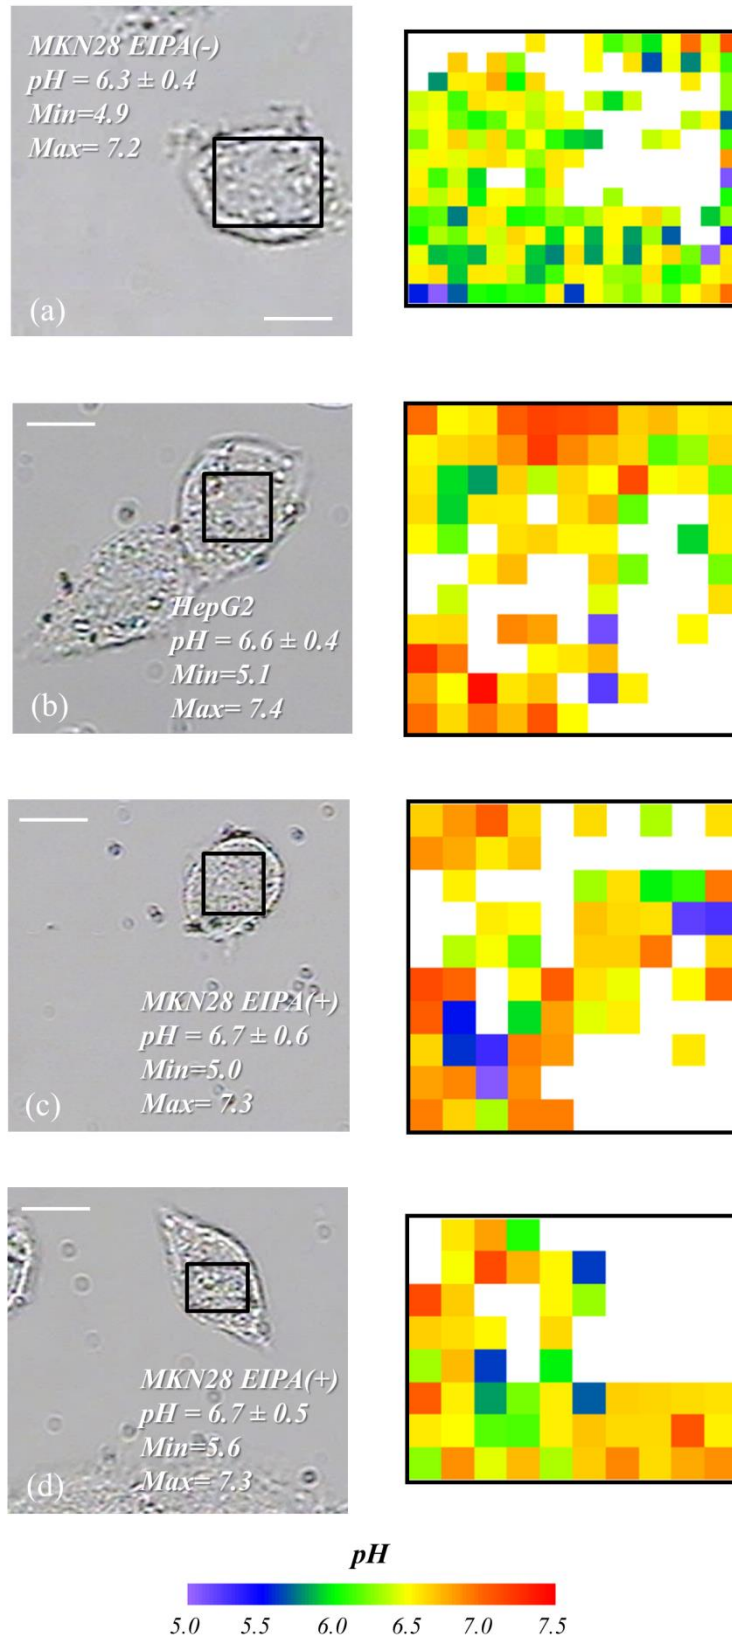

**Supplementary Figure 7: Further examples of hyperspectral maps of cell surface pH.**

The results were obtained from MKN28 (a), HepG2 (b) and MKN28 treated with EIPA (c)-(d). Scale bars: 10  $\mu$ m.

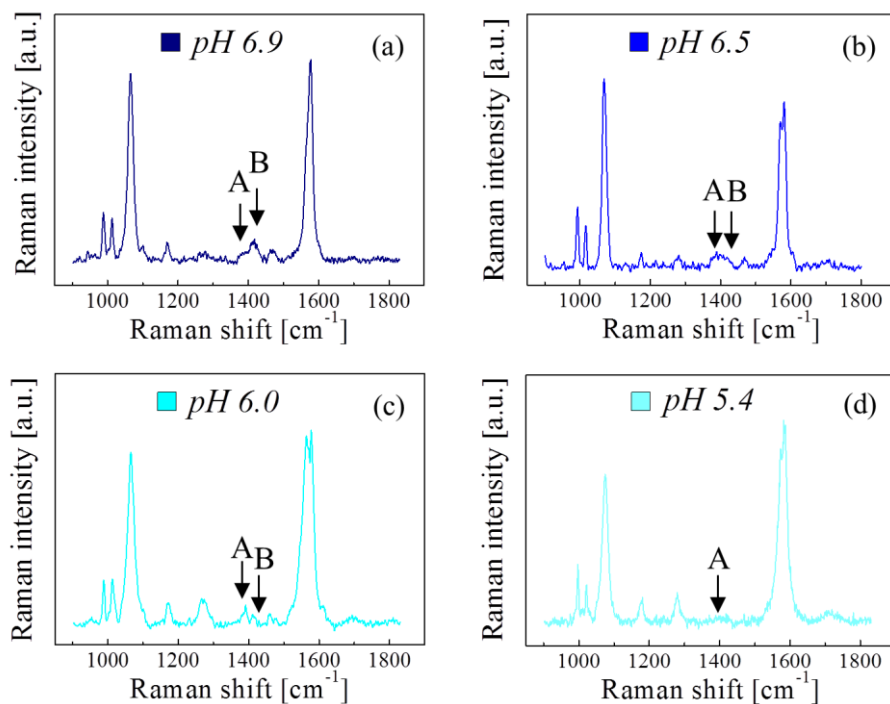

**Supplementary Figure 8: Typical SERS spectra collected from cell surface.**

Example spectra obtained from the analyses of MKN28 cells treated with 4-MBA conjugated AuNP and representative of locations at different local surface pH. At pH = 6.9 (a) and 6.5 (b), the contribution of band B to the total intensity of COO<sup>-</sup> symmetric stretching is still strong. Conversely, at pH 6.0 (c) and 5.4 (d), the weak intensity is mainly represented by band A. (a) and (d) are also reported in Fig. 9 (g) - (h) of the manuscript.

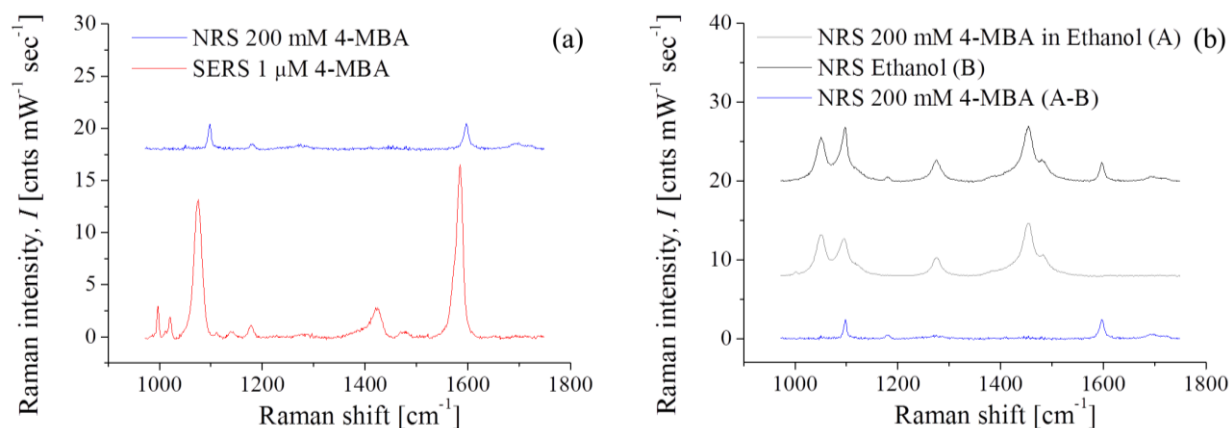

### Supplementary Figure 9: Raman spectra for the calculation of the enhancement factor.

(a) Normal Raman spectrum (NRS) of 200 mM 4-MBA in ethanol solution compared to SERS spectrum from 1  $\mu\text{M}$  4-MBA colloidal solution of AuNP. (b) NRS spectrum of 4-MBA in ethanol solution shown in (a) was obtained after subtraction of the ethanol spectrum.

### References:

- [1] Baldwin, J. A., Vlčková, B., Andrews, M. P. & Butler, I. S. Surface-Enhanced Raman Scattering of Mercaptopyrindines and Pyrazinamide Incorporated in Silver Colloid- Adsorbate Films. *Langmuir* 13, 3744-3751 (1997).
- [2] Nalbant Esenturk, E. & Hight Walker, A. Surface - enhanced Raman scattering spectroscopy via gold nanostars. *Journal of Raman Spectroscopy: An International Journal for Original Work in all Aspects of Raman Spectroscopy, Including Higher Order Processes, and also Brillouin and Rayleigh Scattering* 40, 86-91 (2009).
- [3] Fraire, J. C., Pérez, L. A. & Coronado, E. A. Cluster size effects in the surface-enhanced Raman scattering response of Ag and Au nanoparticle aggregates: experimental and theoretical insight. *The Journal of Physical Chemistry C* 117, 23090-23107 (2013).
- [4] Podstawka, E., Ozaki, Y. & Proniewicz, L. M. Part III: Surface-enhanced Raman scattering of amino acids and their homodipeptide monolayers deposited onto colloidal gold surface. *Applied spectroscopy* 59, 1516-1526 (2005).
- [5] Smith, E. A. et al. Formation, spectroscopic characterization, and application of sulfhydryl-terminated alkanethiol monolayers for the chemical attachment of DNA onto gold surfaces. *Langmuir* 17, 2502-2507 (2001).
