# Supplementary material for: Bioconjugation strategy for cell surface labelling with gold nanostructures designed for highly localized pH measurement
Source: PubMed Central journal article supplement (PMC6290020; doi:10.1038/s41467-018-07726-5), 2018-12-11
Supplement: 41467_2018_7726_MOESM6_ESM.pdf [file 41467_2018_7726_MOESM6_ESM.pdf]

Reviewers' comments:

Reviewer #1 (Remarks to the Author):

In this manuscript, the authors described a surface enhanced Raman spectroscopy (SERS) approach to monitor pH on cell surfaces with a relatively high spatial resolution. AuNPs modified with 4-mercaptobenzoic acid (4-MBA) were conjugated on cell surfaces using the biotin-streptavidin interaction. The monolayer of 4-MBA on AuNPs has strong surface plasmon enhanced Raman scattering, and the scattering depends on the pH of the surrounding nanoenvironment, enabling the sensing of local pH on cell surfaces. This study represents a new application of cell membrane modification and is of interest to the field. The developed method may be useful to reveal some fundamental biological questions. However, there are several major issues need to be addressed.

1. Figure 2c-d showed nice ring like structures, indicating Alexa-streptavidin was on the cell membranes. However, the fragmentation of nuclei may be an indicator of cell apoptosis. The data raise a concern on the viability of cells after the treatment. The authors claimed that the modification did not induce cell death, but there is no any cell viability data in the main text or supporting information.

2. In this study, cell membranes were first biotinylated and conjugated with biotinylated AuNPs using streptavidin as the bridge. The same method has been previously developed for anchoring NPs on cell membranes (Cheng et al. *ACS Nano*, 2010, 4, 625), in which some data may be used as references for works presented in this manuscript. A review paper (Stephan et al. *Nano Today*, 2011, 6, 309.) may be helpful for the authors to learn more about engineering cell surfaces with NPs. The authors have claimed that their AuNPs stayed on cell surfaces without detectable internalization by MKN28 cells. It is important to describe clearly the time frame of the study because NPs cannot stay on cell surfaces forever. To explain the low NP uptake, the authors mentioned that "the sulfo group in the molecular label prevented endocytosis" on page 5 without citing any references. Even if the free linker molecule is cell membrane-impermeable, it cannot explain the low endocytosis of AuNPs at here because the endocytosis of AuNPs likely depends on the cell membrane proteins that AuNPs linked to. In the previous paper of Cheng et al, it was explained that the multiple binding of NPs with cell membranes interfered with cell endocytosis and caused NP aggregation on cell membranes.

3. To conjugate AuNPs on cell membranes, streptavidin was attached on bionylated AuNPs, but leaving some biotin sites available. The authors then biotinylated cell membranes and coated another layer of streptavidin on cells before conjugating AuNPs on cell surfaces. The rationale of this complicated process is unclear. Why don't directly conjugate streptavidin-coated AuNPs on biotinylated cell membranes or directly conjugate biotinylated AuNPs on streptavidin-coated cell surfaces?

4. The authors have used the term pH nanosensor. However, the resolution of SERS signal was about 1  $\mu\text{m}$  as shown in Figure 7. The 2D SERS signal itself cannot directly distinguish protons in cytosol of cells and on cell membranes. It relies on the navigation of AuNPs via other methods. Compared to a recent publication utilizing surface energy transfer to AuNPs for local intracellular pH detection (ACS Nano DOI: 10.1021/acsnano.8b02200), the approach described in this manuscript does not seem have advantages in spatial resolution or convenience for broad applications. Note the method in this very recent ACS Nano paper can be extended to membrane-conjugated AuNPs.

5. Figure 7c studied the change of average pH value on cell surfaces with and without the presence of EIPA. To further validate the strategy, an established method detecting the pH variation caused by EIPA should be used as a control.

6. The TEM images in Figure 4 clearly showed AuNP aggregation and a heterogeneous distribution on cell surfaces. It is unclear if the local SERS signal difference is due to pH variation on cell surfaces or the difference of local AuNP density. An experiment needs to be designed to address this question. For example, fixing the cells after AuNP conjugation on cell surfaces may eliminate local pH difference. Can the SERS signal become homogeneous?

Reviewer #2 (Remarks to the Author):

In this work, authors reported a method for interstitial pH sensing with high resolution based on SERS. Specifically, they immobilized the gold nanoparticles (AuNPs), which are functionalized with 4-mercaptobenzoic acid (4-MBA), to the cell membrane via a streptavidin bridge using two molecular compounds containing biotin: a pyridyldithiol-biotin compound (HPDP-B), which conjugates to AuNP via thiol-gold interaction, and a sulfo-NHS-ester-biotin compound (NHS-B) that reacts with the primary amines of lysine and the amino-termini of polypeptides on the outer cell membrane surface. Since the SERS signal of the COO<sup>-</sup> band varies with pH values due to protonation/de-protonation, the relative peak intensity change is used to indicate the pH values after obtaining the calibration curve. Using 4-MBA functionalized SERS-active substrates (either AuNPs (refs 19-22) or Au nanostructures (e.g., Biosensors and Bioelectronics 73 (2015) 202–207) for cell pH sensing have been reported. From this point of view, this method is not new. The unique of this work lies on the using of NHS-B to un-specifically link to membrane proteins and then using streptavidin to further link HPDP-B to 4-MBA functionalized AuNPs. In this way, AuNPs are located at the outside of cell membrane close to ion channels and transporters, enabling pH sensing locally and even after treated with NHE inhibitor, while AuNPs are located in the intracellular in the previous reported works (refs. 19-22). However, the work (Biosensors and Bioelectronics 73 (2015) 202–207) reported the direct and accurate mapping extracellular pH of living cells in complex media using SERS based on 4-MBA functionalized Au nanostructure arrays. Therefore, in general, the work is an increment, lacks of novelty. In addition, more comments are provided below.

1. The assignment of 1068 and 1588 cm<sup>-1</sup> peaks in the sentence on P.6 line 207 is wrong, i.e., "...bands located at 1068 and 1588 cm<sup>-1</sup> are due to v<sub>8a</sub> and v<sub>12</sub> aromatic ring vibrations, respectively,..." The bands located at 1068 and 1588 cm<sup>-1</sup> should be due to v<sub>12</sub> and v<sub>8a</sub> aromatic ring vibrations, respectively. Therefore, the sentence on p. 7 line 229 "...v<sub>8a</sub> or v<sub>12</sub> aromatic ring vibrations, namely bands C+H or D+I in Fig. 5 (a),..." is also wrong.
2. The assignment and explanation about 1390 and 1415 cm<sup>-1</sup> bands could also be questionable. In the work reported in Biosensors and Bioelectronics 73 (2015) 202–207, it showed the peak intensity change of two peaks versus the pH values from 4.05 to 8.99. In that work, Au nanostructure instead of AuNPs was used as the SERS-active substrates, so there is less or no chance for 4-MBA molecules that have form SAM to undergo a dramatic orientation change.
3. Caption of Figure 5a should provide the ratio of 4-MBA/HPDP-B. The 2-pyridine shown in Figs. 5a and 5b could cause a confusion as there is no 2-pyridine was immobilized on AuNPs. Why are the four strong peaks shown in Fig. 5b due to HPDP-B related to 2-pyridine? Due to the smaller Raman scattering cross-section of HPDP-B compared to 4-MBA, it is reasonable that the intensity is about one order of magnitude lower than 4-MBA in Fig. 5a. The four strong peaks in Fig. 5b should be more related to O=C-NH as they are more close to sensing surface.
4. As reported in Biosensors and Bioelectronics 73 (2015) 202–207, other cations, especially divalent cations (Ca<sup>2+</sup>, Mg<sup>2+</sup>) can cause the intensity change and the peak shift of ~1420 cm<sup>-1</sup> peak. In this study, as stated on p.11 lines 358-361, "During the spectroscopic analyses we used an isotonic buffer solution containing 115 mM NaCl, 15 mM NaNO<sub>3</sub>, 5 mM KCl, 1 mM Ca(NO<sub>3</sub>)<sub>2</sub>, 1 mM Mg(NO<sub>3</sub>)<sub>2</sub>, 10 mM HEPES, 10 mM glucose, 10 mM sucrose and adjusted to pH 7.4 by adding CsOH." Therefore, the calibration curve (Fig. 6a) should also be done in such solution. While this won't affect the trend by adding EIPA, the real pH values could be different.
5. The 2D pH mapping via the xy raster scan shown in Figure 7 should provide the z position. As

shown in Figure 2 of Supporting Information, SERS spectra signal only appeared locally where AuNP aggregations are. Also, for Figure 2 of Supporting Information, it also needs to indicate where this z-scan was done. My guess is that this should not be in the middle of the cell as the strong SERS signal from the middle of the z-scan range. This z-scan might be taken close to the edge of the cell.

6. The claim of two peaks at 999 and 1021  $\text{cm}^{-1}$ , which are associated with the decomposed aromatic species (i.e., TP), needs to be careful. Why there are no obvious such two peaks in the pH calibration experiments, i.e., Figure 6, for both acidic ( $\text{pH} = 6.0$ ) and basic ( $\text{pH} = 8.0$ ), compared to the detection of cells (Fig. 7)? The increase of these two peaks could be due to the orientation change of 4-MBA. The increase of these two peaks upon the binding of fructose on 4-mercaptoproic acid SAM was reported in ACS Nano 9, 2668 (2015).

7. In the Figure 3 of Supporting Information, the optical images show clearly that there are many AuNPs at the edges of cells. Did authors collect the SERS data from those areas? How about the pH values of those areas?

8. CFM was applied to confirm the label was only at the membrane of cells. However, as shown in TEM and even optical images, the AuNPs can be clearly seen. Therefore, CFM method may not be needed.

9. Figure 1 of Supporting Information needs to provide the z values for each line scan.

10. The wavenumber of peak around 1600-1670  $\text{cm}^{-1}$  was labeled differently in the Figure 7 caption (1063  $\text{cm}^{-1}$ ) but 1068  $\text{cm}^{-1}$  in the legend.

Reviewer #3 (Remarks to the Author):

In the present article a novel method ( or approach) that aims to measure the extremely sharp pH gradients in extracellular environments, close to cell membrane proteins, is developed. This is a a topic of great relevance in Cell Biology due to its critical role in controlling many cellular functions, including cell proliferation, metastasis, drug resistance and apoptosis.

The method consist in anchoring Au nanoparticles (NPs) functionalized with a mercaptobenzoic acid (MBA) to the outer part of the cell membrane. As the MBA molecule is known to be a molecule whose Raman response is dependent on the external pH, a calibration curve that relates the ratio between typical Raman bands of this molecule and the pH could be constructed. The presence of Au NPs provides an enhancement of the Raman signals of MBA (SERS) as well as a method to localize them only on the extracellular membrane region.

This attachment is achieved by treating the membrane with a sulfo-NHS-ester-biotin compound which reacts specifically with the polypeptides present in the membrane and by functionalizing the Au NP also with a pyridyldithiol-biotin compound (HPDP-B), and then adding Streptavidin (STV) that acts as a bridge between the biotinylated Au NP and the biotinylated cell membrane.

At the same time control confocal fluorescence microscopy ( using STV with a fluorescence probe molecule) experiments, as well as TEM images, demonstrate the successful functionalization of the external part of the cell membrane.

All the experiments were performed with human gastric adenocarcinoma cell line, MKN28, and the shape of Au NPs (nano-urchins) was chosen to maximize the SERS enhancement of the MBA molecule.

The nanometer size of the AuNP sensor attached to the proteins and the use of SERS allows to visualize the highly localized variation of pH induced by proton extrusion, which is upregulated in cancer cells. The measurements were performed before and after addition of ethyl-isopropyl amiloride (EIPA), an inhibitor of  $\text{Na}^+/\text{H}^+$  exchanger (NHE). In addition Raman image was also performed for scanning ( using the MBA molecule as reporter) the pH variation along the z direction.

The article is well written and of great interest for a wide audience , however it seems to me that the following issues should be addressed, before the manuscript should be suitable to be published in Nature communications:

a) For the calibration curve, the SERS active modes coming from HPDP B and TP molecules seems to be taken into account. However in the real samples also the Raman bands of Streptavidine should experience significant SERS enhancement.

Have the authors considered this issue?.

b) The resolution of the average pH measurements are diffraction limited to the size of the laser spot, therefore the SERS signals are the average within this area and also the pH values. It is not clear why the axial resolution is diffraction limited while the resolution along the other directions is dictated by the size of the Au NP degree of agglomeration. This point should be explained more clearly.

c) Can the author estimate the SERS enhancement factor of the relevant molecular probe involved (MBA) and its dependence on the degree of Au NP agglomeration. This issue is very important since the value of pH depends on the SERS intensity of the relevant bands and their intensities should also depend on the degree of agglomeration and the average distance between Au NPs.

1 **Response to the Reviewers' comments and remarks:**

2  
3 We sincerely thank the Reviewers for their time and effort in reviewing our paper. Independently on the final  
4 result of this submission, we would like to express our appreciation and gratitude for the extremely valuable  
5 and pertinent comments to our research. We strongly believe that the Reviewers' remarks and opinions  
6 highly contributed to improve the quality of our work after thoughtful and careful revision. In the revised  
7 version of the manuscript, we addressed all the queries raised by the Reviewers, point by point. In addition,  
8 new data are also presented to elevate the quality of our study, which is now much more detailed and  
9 comprehensive. We are confident that the new compelling experimental evidence and discussion will remove  
10 any doubt over our statement of unprecedented method for cell surface pH measurement based on surface  
11 enhanced Raman spectroscopy. The revised parts in the new manuscript and the answers to each comment in  
12 this document are written in red:

13  
14  
15  
16 Reviewer #1 (Remarks to the Author):  
17

18 1. Figure 2c-d showed nice ring like structures, indicating Alexa-streptavidin was on the cell membranes.  
19 However, the fragmentation of nuclei may be an indicator of cell apoptosis. The data raise a concern on the  
20 viability of cells after the treatment. The authors claimed that the modification did not induce cell death, but  
21 there is no any cell viability data in the main text or supporting information.

22 In the revised manuscript we provide cell viability data (MTT assay and propidium iodide (PI) fluorescent  
23 staining) as requested by the Reviewer. Please refer to the new text added at the end of the section *Outer cell*  
24 *membrane surface labelling* (pg. 6, starting from "As a final validation step of the protocol,..."); the new Fig.  
25 4 and the details of the protocol at pg. 18, in the paragraph *Cytotoxicity assay* of the section *Methods*. We  
26 acknowledge the importance of this information that was missing. Please note that Fig. 2 of the original  
27 manuscript is Fig. S1 in the revised manuscript (it was moved to *Supporting information*). We would like to  
28 remark the fact that in Figs. S1 (e)-(g) nuclear fragmentation can be observed in two cells that are in the final  
29 stage of mitosis, during which nuclear fragmentation is a physiological feature. In order to substantiate this  
30 point, we also provide new fluorescence images obtained from MKN-28 cells stained with PI and Hoechst  
31 dyes, in which there are clear examples of mitosis with nuclei fragmentation and without PI red fluorescence.  
32 Please refer to Figs. (f)-(i). We believe that the presented new images represent a further validation of the  
33 cell viability test results, namely the lack of cell apoptosis induced by our treatment.

34  
35 2. In this study, cell membranes were first biotinylated and conjugated with biotinylated AuNPs using  
36 streptavidin as the bridge. The same method has been previously developed for anchoring NPs on cell  
37 membranes (Cheng et al. ACS Nano, 2010, 4, 625), in which some data may be used as references for works  
38 presented in this manuscript. A review paper (Stephan et al. Nano Today, 2011, 6, 309.) may be helpful for  
39 the authors to learn more about engineering cell surfaces with NPs. The authors have claimed that their  
40 AuNPs stayed on cell surfaces without detectable internalization by MKN28 cells. It is important to describe  
41 clearly the time frame of the study because NPs cannot stay on cell surfaces forever. To explain the low NP  
42 uptake, the authors mentioned that "the sulfo group in the molecular label prevented endocytosis" on page 5  
43 without citing any references. Even if the free linker molecule is cell membrane-impermeable, it cannot  
44 explain the low endocytosis of AuNPs at here because the endocytosis of AuNPs likely depends on the cell  
45 membrane proteins that AuNPs linked to. In the previous paper of Cheng et al, it was explained that the  
46 multiple binding of NPs with cell membranes interfered with cell endocytosis and caused NP aggregation on  
47 cell membranes.

48 We thank Reviewer #1 for the interesting comment and suggestions. We referred the work by Chen et. al. at  
49 pg. 4, Line 6 from the bottom (*Ref.* [28]). We humbly admit that we were not aware of that work and we  
50 believe that the previous use of NHS-biotin for unspecific labeling of surface proteins with Neutravidin  
51 conjugated nano-fluorospheres should be mentioned, but it does not diminish the novelty of our pH sensor.  
52 In fact, the basic idea of our method has a different purpose and, consequently, the strategy for nanoparticles  
53 conjugation and attachment is more elaborated. The use of NHS-biotin and streptavidin (SA) is only one  
54 piece of a more complex puzzle that had to be carefully assembled to achieve the final goal of attachment

55 AND pH measurement. The AuNP surface cannot be entirely conjugated with SA as reported by Chen et. al.  
56 because the SERS intensity from SA should not interfere with the 4-MBA signal. For this reason, we firstly  
57 conjugated SA to the NHS-biotin attached to the outer membrane proteins and then with added the AuNPs  
58 functionalized with 4-MBA and HPDP-biotin. The result is approximately 1 SA for 1 AuNP and,  
59 consequently, the effect of this protein to the collected SERS signal is negligible. For the same reason, also  
60 the concentration of HPDP-biotin bound to AuNP had to be adjusted to avoid contribution to the collected  
61 SERS intensity. The result of this calibrated procedure is the homogeneous distribution of AuNP showed in  
62 our paper and the formation of nanoclusters. We believe that these arguments require to be clearly elucidated  
63 in the revised manuscript and we took advantage of the Reviewer's comment to implement the text at the  
64 beginning of paragraph *Outer cell membrane surface labelling* at pg. 4. As far as the AuNP internalization  
65 issue is concerned, when we mention that "the sulfo group in the molecular label prevented endocytosis" on  
66 page 5, we are referring to the previous Fig. 2 (now S1 of *Supporting information*), which reports the results  
67 of cell surface biotinylation without AuNP. In fact, the experiments with sulfo-NHS-biotin conjugated with  
68 fluorescent dye (i.e., without AuNPs) were designed to study the reaction of NHS ester group to the cell  
69 membrane proteins. In cancer cells we found that higher pH of the buffer solution during 30 minutes of  
70 biotinylation increased the yield of reaction. These experiments also confirmed the homogeneous distribution  
71 of sulfo-NHS-biotin molecules attached to the cell surface. The presence of the sulfo-group prevents  
72 internalization of NHS-biotin and enables only the selective targeting of cell outer membrane proteins. Once  
73 the AuNP are attached to NHS-biotin after the following step of the protocol, we are completely aware that  
74 the endocytosis of AuNP is not prevented by the sulfo-groups. We apologize for the improper use of  
75 "endocytosis" in the phrase mentioned by the Reviewer, which may have been misleading. In the revised  
76 manuscript we changed the word "endocytosis" to "internalization", which is referred only to NHS-biotin  
77 during the biotinylation step (see pg. 5, 7<sup>th</sup> line from the bottom of the page). The lack of AuNP endocytosis  
78 during our Raman experiments was proved by the results showed in Fig. 3 (i.e., Fig. 4 of the previous  
79 version): the TEM images were purposely taken from cells that underwent to fixation 1 hour after the end of  
80 AuNP attachment, which corresponds to the average time spent for the Raman experiments shown in this  
81 paper. In the original manuscript, at Line 19 of pg. 5, we stated that we waited 1 hr before fixation and TEM  
82 imaging. Cheng et al. showed lack of endocytosis for up to 2 days, which is a remarkable result that was  
83 explained by nanoparticles binding with multiple surface proteins. In the revised version we added this  
84 explanation in the new text from Line 7 of pg. 6. In addition, Reference [30] (Stephan et al. Nano Today,  
85 2011, 6, 309) was added at pg. 6, Line 13.

86  
87 3. To conjugate AuNPs on cell membranes, streptavidin was attached on bionylated AuNPs, but leaving  
88 some biotin sites available. The authors then biotinylated cell membranes and coated another layer of  
89 streptavidin on cells before conjugating AuNPs on cell surfaces. The rationale of this complicated process is  
90 unclear. Why don't directly conjugate streptavidin-coated AuNPs on biotinylated cell membranes or directly  
91 conjugate biotinylated AuNPs on streptavidin-coated cell surfaces?

92 Actually, we directly conjugated biotinylated AuNPs to streptavidin-coated cell surfaces. In the paragraph  
93 *Conjugation of AuNP for SERS and CFM analyses* of the section *Method*, we did not mention any incubation  
94 of AuNP with SA. The nanoparticles are conjugated with 4-MBA and HPDP-biotin. In the paragraph  
95 *Protocol for cell membrane surface labelling with conjugated AuNP* we explained 3 separated steps: 1)  
96 NHS-Biotin reacting with cell surface proteins; 2) washing and addition of SA that reacts with NHS-biotin;  
97 3) washing and incubation with 4-MBA/HPDP-biotin conjugated AuNP. Please see the new text at the  
98 beginning of paragraph *Outer cell membrane surface labelling* (pg. 4), as also already discussed in the  
99 answer to Comment 2.

100 In the case of CFM experiments, we conjugated AuNP with streptavidin-Alexa488 in order to attach the  
101 fluorescent dye to some of the HPDP-biotin previously attached to the AuNP. The HPDP-biotin:streptavidin-  
102 Alexa488 ratio was 3:2, in order to leave unreacted biotins on the surface of AuNPs for the attachment to  
103 surface membrane proteins coated with streptavidin.

104  
105 4. The authors have used the term pH nanosensor. However, the resolution of SERS signal was about 1  $\mu\text{m}$   
106 as shown in Figure 7. The 2D SERS signal itself cannot directly distinguish protons in cytosol of cells and on  
107 cell membranes. It relies on the navigation of AuNPs via other methods. Compared to a recent publication  
108 utilizing surface energy transfer to AuNPs for local intracellular pH detection (ACS Nano DOI:  
109 10.1021/acsnano.8b02200), the approach described in this manuscript does not seem have advantages in

110 spatial resolution or convenience for broad applications. Note the method in this very recent ACS Nano  
111 paper can be extended to membrane-conjugated AuNPs.

112 We believe that the Reviewer is referring to 1  $\mu\text{m}$  as the in-plane resolution. The in-plane resolution is given  
113 by the size of the laser spot, which is diffraction limited and it was estimated as 700 nm (See the new Fig. 3  
114 (b) in the revised manuscript). Note that in the original version we erroneously reported the FWHM of the  
115 Gaussian beam (441 nm). We repeated more experiments with fluorescent beads and we used the width of  
116 the Gaussian function at  $1/e^2$  of its peak, which is a better estimation of the spot size (now 700 nm). In Fig. 8  
117 (Fig. 7 of the original manuscript), we show the results of in-plane  $xy$  raster scans of points with 1  $\mu\text{m}$  steps,  
118 in which the pH value of each point is associated to the relative 1  $\mu\text{m} \times 1 \mu\text{m}$  square of the mesh. This is an  
119 approximation for graphical purposes. In reality, each colored square of the map should be reshaped as a  
120 circle and scaled down to a diameter of 0.7  $\mu\text{m}$ . We added to the caption of Fig. 8 that each point of the maps  
121 corresponds effectively to a spot of 700 nm diameter. We hope that we may be granted of this graphical  
122 approximation. Nonetheless, for the scope of the present investigation, which is the highly localized  
123 measurement of cell outer surface pH, the spatial resolution that matters the most is the one given by the  
124 distance of the sensor from the cell outer surface and the size of the sensor itself. According to our results,  
125 the nanoparticles are clearly attached to the outer surface and the size of the sensor ranges from 90 nm (1  
126 AuNP) to 400 nm (biggest observed nano-aggregates). In other words, the size and the location of the pH-  
127 probe are suitable to investigate the layer of the extracellular milieu in which steep pH gradients manifest  
128 themselves. Please refer to the new text at pg. 6, from Line 16. See also the answer to Comment 2 of  
129 Reviewer #3.

130  
131 We added new text in the *Conclusion*, at pgs. 13 and 14, in which we mention the interesting method  
132 introduced in ACS Nano DOI: 10.1021/acsnano.8b02200. The pH assessment based on surface energy  
133 transfer using gold nanoparticles and fluorescence dyes reduces the rates of laser-induced photo-bleaching in  
134 multi-hour live-cell experiments. This method can certainly be extended to cell outer membrane surface  
135 analysis, by taking advantage of part of the knowledge introduced in our paper. Nonetheless, the spatial  
136 resolution will be equal to our SERS-based method, as well as the “time window” in which extracellular  
137 surface pH can be reliably measured, which is controlled by the endocytosis of the AuNP.

138  
139 5. Figure 7c studied the change of average pH value on cell surfaces with and without the presence of EIPA.  
140 To further validate the strategy, an established method detecting the pH variation caused by EIPA should be  
141 used as a control.

142 We provided standard measurement of cytosolic pH variation induced by EIPA during the acute phase using  
143 pH-sensitive fluorescent dye. Although these pH data are not comparable to the highly localized  
144 measurements of surface pH, the drop of intracellular pH during the acute phase confirm the inhibition of  
145  $\text{Na}^+/\text{H}^+$  exchangers and the rise of external surface pH measured by SERS. See the new Fig. S7 in  
146 *Supporting information*; the text at pg. 12, from Line 8 and the experimental procedure added in paragraph  
147 *Confocal fluorescence microscopy* at pg. 16.

148  
149 6. The TEM images in Figure 4 clearly showed AuNP aggregation and a heterogeneous distribution on cell  
150 surfaces. It is unclear if the local SERS signal difference is due to pH variation on cell surfaces or the  
151 difference of local AuNP density. An experiment needs to be designed to address this question. For example,  
152 fixing the cells after AuNP conjugation on cell surfaces may eliminate local pH difference. Can the SERS  
153 signal become homogeneous?

154 We performed the requested experiment and the data were added in the new Fig. 8 of the revised version,  
155 which presents the results of 4 cases: MKN-28 with and without addition of EIPA; HepG2 with and without  
156 addition of glutaraldehyde/paraformaldehyde for fixation. Please refer to pg. 12, from Line 12, where new  
157 text was added to introduce the new data of Fig. 8 (d).

158  
159

160 Reviewer #2 (Remarks to the Author):

161

162 Using 4-MBA functionalized SERS-active substrates (either AuNPs (refs 19-22) or Au nanostructures (e.g.,  
163 Biosensors and Bioelectronics 73 (2015) 202–207) for cell pH sensing have been reported. From this point of  
164 view, this method is not new. The unique of this work lies on the using of NHS-B to un-specifically link to  
165 membrane proteins and then using streptavidin to further link HPDP-B to 4-MBA functionalized AuNPs. In



166 this way, AuNPs are located at the outside of cell membrane close to ion channels and transporters, enabling  
167 pH sensing locally and even after treated with NHE inhibitor, while AuNPs are located in the intracellular in  
168 the previous reported works (refs. 19-22). However, the work (*Biosensors and Bioelectronics* 73 (2015) 202–  
169 207) reported the direct and accurate mapping extracellular pH of living cells in complex media using SERS  
170 based on 4-MBA functionalized Au nanostructure arrays. Therefore, in general, the work is an increment,  
171 lacks of novelty.

172 We were aware of that paper, but we believe that the spatial resolution of our method can be compared to  
173 that reported by Anderson et al. (Ref. [12]), which, on the other hand, can be applied only to cancer cells  
174 because based on the use of low-pH insertion peptides and it may be limited by photo-bleaching of the  
175 fluorescent dye. The method proposed in *Biosensors and Bioelectronics* 73 (2015) 202–207 by Sun *et.al.* is  
176 certainly remarkable. It enabled to visualize surface acidosis in HepG2 liver cancer cells, but the mean value  
177 of pH was 7.2, namely much more alkaline than those reported in previous investigations on extracellular pH  
178 of solid hepatocellular carcinomas (see Ref [19-21] and the text added in the introduction at pg. 3 and 4).  
179 Accordingly, if the pH-sensitive probe on the substrate of Sun *et al.* had been indeed entirely attached to the  
180 cell surface, it should have detected higher proton concentration. In the revised paper, we present new data  
181 collected from HepG2 using our method. Cell surface pH was estimated as 6.7, much more acidic than pH  
182 reported by Sun *et. al.*. Please refer to the new Fig. 8. In the manuscript, starting from the last two lines of pg.  
183 12, we address this issue. We explain that HepG2 cells exhibit high concentration of filopodial protrusions  
184 formed on the membrane (see Ref. [55, 56]). The TEM image in Fig. 3 (a) of our revised manuscript clearly  
185 shows the presence of micrometric filopodia also on the basal surface of MKN-28 cells. From this  
186 morphological characterization it follows that in Sun *et. al.* the cells adhered to the gold nanostructured  
187 substrate through filopodia, while an extended part of 4-MBA SAM probed by the laser was “untouched”,  
188 but separated at micrometric distance from the membrane, where the effect of the buffer solution affected the  
189 pH results. In addition, the method reported by Sun *et. al.* can be applied only to study the basal side of the  
190 cells, while in our method the nanoparticles can be attached to both apical and basolateral side of cells,  
191 which may be important for future studies on epithelial cells. The pores of permeable membranes for  
192 epithelial cell culture enable the biotinylation of the basolateral surface and the attachment of nanoparticles  
193 (we are currently making experiments on human bronchial epithelial cells). Based on these considerations,  
194 we believe that the difference between the two methods is obvious, not only in terms of experimental  
195 approach but, by far, in terms of enhanced spatial resolution and localization of the surface pH assessment.  
196 For this reason we did not add the paper of Sun *et al.* to the discussion of the previous manuscript that was  
197 originally conceived as a short communication. We regret about that choice because we now acknowledge  
198 that supplemental experimental evidence and discussion concerning this issue were necessary.

199 We hope that these new evidence and arguments may convince the Reviewer to reconsider her/his previous  
200 opinion about lack of novelty in our work.

201  
202

203 1. The assignment of 1068 and 1588 cm<sup>-1</sup> peaks in the sentence on P.6 line 207 is wrong, i.e., “...bands  
204 located at 1068 and 1588 cm<sup>-1</sup> are due to  $\nu_{8a}$  and  $\nu_{12}$  aromatic ring vibrations, respectively,...” The bands  
205 located at 1068 and 1588 cm<sup>-1</sup> should be due to  $\nu_{12}$  and  $\nu_{8a}$  aromatic ring vibrations, respectively.  
206 Therefore, the sentence on p. 7 line 229 “... $\nu_{8a}$  or  $\nu_{12}$  aromatic ring vibrations, namely bands C+H or D+I in  
207 Fig. 5 (a),...” is also wrong.

208 The Reviewer is correct and we thank him/her for noticing our careless mistake. See the corrections at pg. 8,  
209 Line 20 and pg. 10, Line 2.

210

211 2. The assignment and explanation about 1390 and 1415 cm<sup>-1</sup> bands could also be questionable. In the work  
212 reported in *Biosensors and Bioelectronics* 73 (2015) 202–207, it showed the peak intensity change of two  
213 peaks versus the pH values from 4.05 to 8.99. In that work, Au nanostructure instead of AuNPs was used as  
214 the SERS-active substrates, so there is less or no chance for 4-MBA molecules that have form SAM to  
215 undergo a dramatic orientation change.

216 In *Biosensors and Bioelectronics* 73 (2015) 202–207 (hereafter referred to Ref. [18], as in the revised  
217 manuscript), the COO<sup>-</sup> symmetric stretching was studied considering only one band, whose increase of  
218 intensity due to increasing pH was noticed along with the peak shift toward higher frequencies. The observed  
219 shift was attributed to some 4-MBA molecules involved in hydrogen bonding and to the possible interaction  
220 between COO<sup>-</sup> groups and the ring hydrogens, but the clear asymmetric nature of this band at neutral and  
221 alkaline pH was neglected.



222 In the revised manuscript, we decided to mention also the explanation of the shift proposed in Ref. [18],  
223 based on hydrogen bonding. Nonetheless, we also keep the characterization of band shift and the formation  
224 of a clear shoulder band according to our original interpretation, which was suggested also by Michiota et al.  
225 [Ref. 33]. We added Ref. [35], in which calculation based on density functional theory on the adsorption  
226 behavior of 4-MBA on silver colloids demonstrated that, depending on pH, the protonated molecules are  
227 bonded to the metal surface only through the S atoms, while, in the deprotonated form, through the S atoms  
228 and the COO<sup>-</sup> groups with a tilted orientation, causing significant intensity shift and the onset of a shoulder  
229 band. Moreover, we added Ref. [36], which demonstrated that benzoic acid, in which thiol group is not  
230 present, conjugates to gold substrates via carboxylate group and the COO<sup>-</sup> symmetric stretching band is  
231 centered at around 1370 cm<sup>-1</sup>, namely gold surface can interact with COO<sup>-</sup>, inducing massive shift of the  
232 Raman stretching band to lower frequencies. Please refer to the new text added from the first line of pg. 8.  
233 Independently on which of the two explanations is more plausible, we believe that the deconvolution of the  
234 Raman intensity around 1400 cm<sup>-1</sup> with 2 bands is the most correct approach. In fact, this approach considers  
235 the contribution of every COO<sup>-</sup> group forming the SAM, namely it is more accurate. Also in Fig. 3 (a) of Ref.  
236 [18] it is clear that, at alkaline pH, the band peak shifts to higher frequencies, but also a shoulder at lower  
237 frequency is formed. The frequencies of the shoulder sub-band are the same frequencies of the band at more  
238 acidic pH, namely the sub-band is still associated to -COO<sup>-</sup> stretching. Nonetheless, this shoulder was  
239 neglected in pH calculation of previous studies.

240  
241 3. Caption of Figure 5a should provide the ratio of 4-MBA/HPDP-B. The 2-pyridine shown in Figs. 5a and  
242 5b could cause a confusion as there is no 2-pyridine was immobilized on AuNPs. Why are the four strong  
243 peaks shown in Fig. 5b due to HPDP-B related to 2-pyridine? Due to the smaller Raman scattering cross-  
244 section of HPDP-B compared to 4-MBA, it is reasonable that the intensity is about one order of magnitude  
245 lower than 4-MBA in Fig. 5a. The four strong peaks in Fig. 5b should be more related to O=C-NH as they  
246 are more close to sensing surface.

247 We added the ratio of 4-MBA/HPDP-B in the new Fig. 5 (a) and in its caption.

248 In addition, we reported a new spectrum of HPDP-B in Fig. 5 (b), from AuNP colloidal solution conjugated  
249 with higher concentration of HPDP-B, which was equal to the concentration used for 4-MBA in Fig. 5(a).

250 In the previous version we showed the spectrum at low concentration, which is the HPDP-B concentration  
251 used for conjugation of the pH-sensor. The aim of the previous version was the confirmation of HPDP-B  
252 conjugation at low concentration and its negligible Raman signal as compared to 4-MBA SAM signal. In the  
253 new version, the HPDP-B spectrum is more intense and the detailed characterization of the SAM is possible.  
254 In Fig. S3 of *Supporting information*, we show the HPDP-B spectrum compared to the SERS spectrum of 2-  
255 pyridine thiolate. The assignments are reported in Table S1 of *supporting information*.

256 The HPDP-B molecule is composed of a pyridyldithiol group linked to a biotin residue via a 2.9 nm hexyl  
257 arm spacer. The disulfide bridge reacts with the gold surface, leading to dissociative adsorption of HPDP-B  
258 through gold-atom-mediated bonds as 2-pyridine (2-Py) thiolate and biotin-hexyl spacer arm thiolate.

259 We did not detect the S-S stretching band at around 500-515 cm<sup>-1</sup>, namely the disulfide bond was broken as  
260 expected (i.e., we added also new references [37] and [38]). The most intense bands of 2-Py thiolate are also  
261 observed in the HPDP-B spectrum, since this molecule is close to the sensing surface. In the HPDP-B  
262 spectrum, we also observed other less intense bands that were associated to the biotin-hexyl spacer arm  
263 thiolate. Please refer to the new text added from Line 23 of pg. 8.

264

265

266

267 4. As reported in *Biosensors and Bioelectronics* 73 (2015) 202–207, other cations, especially divalent cations  
268 (Ca<sup>2+</sup>, Mg<sup>2+</sup>) can cause the intensity change and the peak shift of ~1420 cm<sup>-1</sup> peak. In this study, as stated  
269 on p.11 lines 358-361, “During the spectroscopic analyses we used an isotonic buffer solution containing 115  
270 mM NaCl, 15 mM NaNO<sub>3</sub>, 5 mM KCl, 1 mM Ca(NO<sub>3</sub>)<sub>2</sub>, 1 mM Mg(NO<sub>3</sub>)<sub>2</sub>, 10 mM HEPES, 10 mM  
271 glucose, 10 mM sucrose and adjusted to pH 7.4 by adding CsOH.” Therefore, the calibration curve (Fig. 6a)  
272 should also be done in such solution. While this won’t affect the trend by adding EIPA, the real pH values  
273 could be different.

274 The reviewer is absolutely right and we thank her/him. We repeated the calibration with AuNP in isotonic  
275 buffer solutions at different pH. The new calibration is shown in the new Fig. 7(a). The divalent cations  
276 clearly affected the band ratio, similarly to *Biosensors and Bioelectronics* 73 (2015) 202–207 (Ref. [18]).

277 The comparison between old and new calibration (PBS vs. isotonic buffer solution used for cells) is reported  
278 here only for the Reviewers, since it is not pertinent to final scope of the paper.  
279

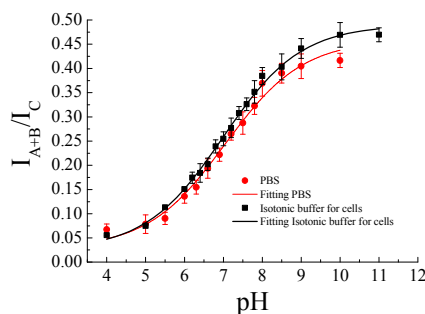

280  
281

282 Accordingly, we recalculated the pH values on the surface of the analyzed cells. The results are shown in the  
283 new Fig. 8. Please note that the cell surface pH values in MKN28 with and without EIPA are now about 0.2  
284 lower than those reported in the original manuscript. The new results are certainly more accurate and they  
285 can finally be compared to those obtained in Ref [12] in the case of cancer cells in the presence of glucose,  
286 as in our experiments. In fact, in our results based on the previous calibration, the MKN28 surface was more  
287 acidic than the cancer cells of Ref. [12] analyzed without glucose, but more alkaline than the cancer cells of  
288 Ref. [12] with glucose. Since in our buffer solution we had glucose, we are happy that our corrected results  
289 are more consistent with the previous results of Ref. [12]. Please refer to the new Fig. 8 and the correction  
290 from Line 17 of pg. 13.  
291

292 5. The 2D pH mapping via the xy raster scan shown in Figure 7 should provide the z position. As shown in  
293 Figure 2 of Supporting Information, SERS spectra signal only appeared locally where AuNP aggregations  
294 are. Also, for Figure 2 of Supporting Information, it also needs to indicate where this z-scan was done. My  
295 guess is that this should not be in the middle of the cell as the strong SERS signal from the middle of the z-  
296 scan range. This z-scan might be taken close to the edge of the cell.  
297

298 Please refer to the new explanation added from Line 4 from the bottom of pg. 10. The z-coordinate of each x-  
299 y raster scan was set after estimation of the average AuNP position in the middle of each analyzed cell by z-  
300 axis line scans. Considering the micrometric axial length of the laser probe, this procedure enabled to  
301 illuminate the AuNP attached to the surface in the majority of the investigated spots. The axial length of the  
302 laser probe was showed in the new Fig. S5 in Supporting information.

303 The scan in Fig. 2 of Supporting information in the previous version is now modified for clarity sake and  
304 reported in the new Fig. S4 of Supporting information. We apologize for the lack of clarity in the explanation  
305 that may have confused the Reviewer. The scan was performed in the middle of the cell. It is a z-scan, from  
306 the bottom glass upon which the cell was seeded to 20  $\mu\text{m}$  above the bottom glass, across the cell. The  
307 position of the maximum intensity at  $z=12 \mu\text{m}$  is the location of the AuNP, namely the cell membrane, since  
308 we demonstrated that AuNP are attached to the outer cell surface. In the new Fig. S4, we added a sketch of  
309 the cell cross-section along which the z-axis line scan of Raman spectra was collected. We added in the  
310 caption of Fig. S4 that the z-axis line scan was performed in the middle of the cell.  
311

312

313 6. The claim of two peaks at 999 and 1021  $\text{cm}^{-1}$ , which are associated with the decomposed aromatic species  
314 (i.e., TP), needs to be careful. Why there are no obvious such two peaks in the pH calibration experiments,  
315 i.e., Figure 6, for both acidic (pH = 6.0) and basic (pH = 8.0), compared to the detection of cells (Fig. 7)?  
316 The increase of these two peaks could be due to the orientation change of 4-MBA. The increase of these two  
317 peaks upon the binding of fructose on 4-mercaptobroic acid SAM was reported in ACS Nano 9, 2668 (2015).  
318

319 In Fig. 6 of the original manuscript, we purposely selected two spectra at different pH but similar lack of  
320 transformation. The aim of the figure is to emphasize the variation of the intensities A+B and E as a function  
321 of pH. For this purpose, we found appropriate to choose two spectra with similar but marginal onset of F, G,  
322 H, and I bands. Please consider that, at laser power of 20 mW, in colloidal solutions we did not detect

323 spectral transformation in every measurement. In the new manuscript we added new arguments and new  
324 experiments to validate our theory of SAM transformation. Please refer to Fig. 6 and the discussion from  
325 Line 12 of pg. 9. The power of the laser indisputably effected the transformation, which was not observed in  
326 every measurement obtained with 1mW (note that in Ref. [18], for example, transformation was not  
327 observed because they used 1 mW). At maximum power (i.e., 72 mW) we always observed the onset of F, G,  
328 H, and I bands. The positions of the new bands, as well as the ratios of their intensities, clearly resemble the  
329 spectrum of TP shown in Fig. 5 (c). Nonetheless, we mentioned also the interpretation of Sun *et. al.* (Ref.  
330 [46]). As suggested by the Reviewer, they hypothesized that the origin of these bands in 4-  
331 mercaptophenylboronic acid (4MPBA) affected by fructose may be due to reorientation and charge  
332 redistribution of the benzene ring. Conversely, Ly et al. (doi.org/10.1002/sia.6184) observed deboronation  
333 reaction of 4MPBA via fructose and glucose on silver surfaces by SERS at the excitation wavelengths of 488,  
334 514, and 633 nm. They found all the characteristic bands of TP as we did. The new Fig. 6 (h) demonstrates  
335 that, although we can debate the origin of the new bands, when they are observed, the deconvolution in sub-  
336 bands and the use of band C is essential for precise pH calculation.

337  
338 7. In the Figure 3 of Supporting Information, the optical images show clearly that there are many AuNPs at  
339 the edges of cells. Did authors collect the SERS data from those areas? How about the pH values of those  
340 areas?

341 Please refer to the new text at pg. 11, from Line 18. We also prepared a new Fig. S6 in *Supporting*  
342 *information*. The average pH measured from spectra of micro-aggregations is 7.41. An example of spectra  
343 collected from micro-aggregation is showed in Fig. S6 (a). In Fig. S6 (b), we compared the intensities of  
344 Band C collected from micro-aggregations, colloidal solutions and x-y raster scans on the surface of cells  
345 without micro-aggregations. There is a clear difference between the intensities detected on micro-  
346 aggregations and the investigated cell surfaces.

347  
348 8. CFM was applied to confirm the label was only at the membrane of cells. However, as shown in TEM and  
349 even optical images, the AuNPs can be clearly seen. Therefore, CFM method may not be needed.

350 We moved Fig. 2 of the previous version to the *Supporting information* (Fig. S1). We would like to preserve  
351 Fig. 3 of the previous version, which is now Fig. 2 in the revised version. The TEM images confirm the  
352 AuNP attachment on the outer membrane, but Fig. 3 is useful to prove the distribution of the AuNP on the  
353 cell surface (*xy plane*).

354  
355 9. Figure 1 of Supporting Information needs to provide the z values for each line scan.

356 We added the information as requested. Figure 1 of Supporting Information is Fig. S2 in the *Supporting*  
357 *information* of the revised manuscript.

358  
359  
360 10. The wavenumber of peak around 1600-1670 cm<sup>-1</sup> was labeled differently in the Figure 7 caption (1063  
361 cm<sup>-1</sup>) but 1068 cm<sup>-1</sup> in the legend.

362 Thank you for noticing this careless mistake. Figure 7 is now Fig. 8 and the caption was modified to explain  
363 the new implemented figure and to fix the mistake (i.e., 1068 instead of 1063).

364  
365  
366 Reviewer #3 (Remarks to the Author):  
367

368 1. For the calibration curve, the SERS active modes coming from HPDP B and TP molecules seems to be  
369 taken into account. However in the real samples also the Raman bands of Streptavidin should experience  
370 significant SERS enhancement. Have the authors considered this issue?

371 According to our protocol, streptavidin (SA) first reacts with biotinylated surface proteins; then, only after  
372 removal of unreacted SA, we add the functionalized AuNP to the cell sample. The AuNP were separately  
373 conjugated to 4-MBA and HPDP-B. This is a crucial feature of the experimental method, since it guarantees  
374 that each AuNP attached to the cell membrane has approximately only one SA molecule close to its surface,  
375 namely the SERS signal of SA does not affect the overriding signal of the pH-sensitive 4-MBA self-  
376 assembled monolayer (SAM). In addition, the Raman scattering is not enhanced in every location of the gold

377 surface, but only on the surface of some hot spots. The hot spots are concentrated on the tips of the nano-  
378 urchins and in the gap between two adjacent AuNP in a nano-cluster. Moreover, the enhancement decreases  
379 exponentially from the surface (i.e., max) to about 10-15 nm away from the surface (i.e., negligible  
380 enhancement). The small 4-MBA is adsorbed on the surface and the SAM is only 0.78 nm thick (Ref. [30]).  
381 Conversely, the SA attached to AuNP is some nanometer away from the surface, considering the HPDP-B  
382 arm spacer length of 3.9 nm. In summary, i) the ratio between 4-MBA and SA on the gold surface is  
383 massively in favor of 4-MBA; ii) the probability that SA is located in the hot spot is also small; iii) the  
384 enhancement factor on the SA attached to gold is smaller than the enhancement on the 4-MBA molecules  
385 stuck on the surface. Please refer to the new text at pg. 4, Line 6 from the bottom.  
386

387 2. The resolution of the average pH measurements are diffraction limited to the size of the laser spot,  
388 therefore the SERS signals are the average within this area and also the pH values. It is not clear why the  
389 axial resolution is diffraction limited while the resolution along the other directions is dictated by the size of  
390 the Au NP degree of agglomeration. This point should be explained more clearly.

391 We added new explanation of the spatial resolution at pg. 6, from Line 16. In the new Fig. 3 (b) we also  
392 added an explanatory description of the SERS pH-probe given by the interaction between the laser beam and  
393 the AuNP. The in-plane spatial resolution of the measurement can be approximated as the size of the laser  
394 spot. Conversely, we define the axial resolution as the maximum distance from the cell surface at which the  
395 pH is measured. Since the SERS signal is merely originated from the 4-MBA SAM (i.e., 0.78 nm thickness,  
396 depicted with green lines in Fig. 3(b)) the axial resolution can be approximated as the size of the nano-  
397 sensors. For example, if we consider one approximately spherical AuNP attached to the surface, it can  
398 probe pH as close as in the point of attachment and as far as in the diametrically opposite point of the AuNP.  
399 The pH calculated by SERS is approximately the average. See the following sketch:  
400  
401

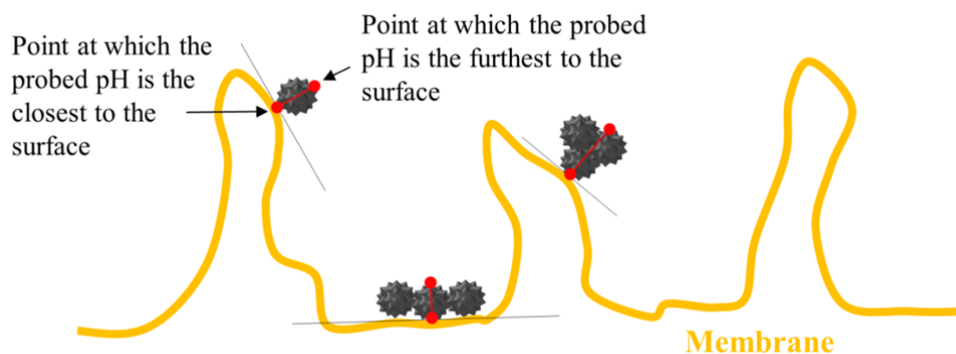

402  
403

404 3. Can the author estimate the SERS enhancement factor of the relevant molecular probe involved (MBA)  
405 and its dependence on the degree of Au NP agglomeration. This issue is very important since the value of pH  
406 depends on the SERS intensity of the relevant bands and their intensities should also depend on the degree of  
407 agglomeration and the average distance between Au NPs.

408 We thank the reviewer for the suggestion. We calculated the enhancement factor. See the new text at the end  
409 of the paragraph *Measurement of pH using AuNP and SERS* (pg. 10); the details of the calculation in the  
410 paragraph *Enhancement factor calculation* of the section *Methods* (pgs. 17 and 18) and the new Fig. S9.

411  
412  
413  
414

#### ADDITIONAL INFORMATION FROM THE AUTHORS:

415 Figure S8 of *Supporting information* is the modified version of the previous Fig. 3 of *Supporting information*.  
416 We show now 4 additional examples of hyperspectral maps of surface pH from MKN28, HepG2 and  
417 MKN28 treated with EIPA.

Reviewers' comments:

Reviewer #1 (Remarks to the Author):

The authors have addressed all my questions. The quality of this manuscript has been significantly improved. However, one concern of this manuscript is still the resolution limit, which is not better than existing pH detection methods.

Reviewer #2 (Remarks to the Author):

In the revision, authors carried out more experiments and revised the manuscript carefully to address the reviewer's comments. While the quality of the work has been significantly improved, some discussions need to be careful to avoid misleading.

1. Regarding the answer to the second question, the reviewer would suggest the authors pay attention to the following points. (a) The condition that the 4-MBA SAM is formed. In both refs 33 and 35, the 4-MBA SAMs were formed in AQUEOUS solution under different pH values. No doubt, under alkaline condition in aqueous solution, COOH groups are deprotonated, so FREE 4-MBA molecules can adsorb on Au (Ag) surface via thiol to form S-Au(Ag) bond and via COO- to form COO-Au(Ag) bond. As pointed in ref. 35, under acidic and neutral conditions (in aqueous solution), 4-MBA adsorb on Ag via strong Ag-S bond, while weak COO-Ag and S-Ag in alkaline condition. In this work, the 4-MBA SAM was formed in PBS buffer condition according to the experimental description. So, majority of 4-MBA (if not all) should adsorb on Au surface via strong Au-S bond. In ref. 18, however, the 4-MBA SAM was formed in ethanol solution, so the binding should be Au-S. (b) Once the 4-MBA SAM has been formed via the Au-S bond, all the 4-MBA molecules have been anchored on the Au surface. In this work, after forming 4-MBA and HPDP-B SAM, "the Au NPs were collected after centrifugation and resuspended in PBS at pH 7.4 for cells treatment or in isotonic buffer solution at different pH for the calibration of the nanosensor (i.e., in the pH range 4 to 10)." So, the COOH group (unbounded) will be protonated or deprotonated in response to the solution / environment pH change. Two possible situations could cause COO-Au interaction even though SAM has been formed: (i) two gold nanoparticles are very close (could be the case in this work since TEM images show Au NP clusters, but this should not be the case when authors did pH calibration in bulk solution), but this is still rare given each NP already has a SAM layer; (ii) multilayer 4-MBA formed in the SAM forming procedure as pointed in ref. 35 (and other people also reported that multilayer instead of monolayer could be formed). In this case, the outer layer 4-MBA molecules that are deprotonated in alkaline condition could diffuse to Au surface and bind via COO-Au bond. Taking these two points into account, the sentences starting with "On the other hand..." in redline on p. 8 lines 256-264 could be misleading. In short, when 4-MBA molecules are free in aqueous solution, under alkaline condition, they can form S-Au and COO-Au bond, but once the SAM has been formed via Au-S, these already bounded molecules have no option to form COO-Au bond even under alkaline condition. The fact of asymmetric peak around 1400 cm<sup>-1</sup> was definitely observed in many publications (like ref. 22 as well). It for sure needs more investigation. Nonetheless, the reviewer feels the discussion on p. 8 lines 256-264 could be misleading.

2. Based on authors' assignment of 1370 cm<sup>-1</sup> peak due to COO-Au, then these COO are not free, they can't respond to pH change, then they should not be counted in the intensity ratio (I<sub>A+B</sub>/I<sub>C</sub>) for the calibration curve. Did authors try to plot the calibration curve using I<sub>B</sub>/I<sub>C</sub>?

Reviewer #3 (Remarks to the Author):

In this revised version of the manuscript the authors have performed significant improvements clarifying in a satisfactory way all the main issues pointed out by myself. In this respect they have clarified the important feature concerning the spatial resolution of the pH sensor and have also analysed the relevant

reporter molecules that are used for pH estimation as well as performed an estimation of the SERS enhancement factor (lower bound).

Therefore, I consider that the main concerns have adequately been answered and the manuscript is now suitable for publication in Nature Communications

Response to Reviewers' remarks:

We truly appreciated the Reviewers' comments, opinions and support to prepare a revised version of our manuscript. We would like to thank the 3 Reviewers for the valuable time they have spent reviewing our work. The revised parts in the new manuscript and the answers to each comment in this document are written in red:

Reviewer #1 (Remarks to the Author):

The authors have addressed all my questions. The quality of this manuscript has been significantly improved. However, one concern of this manuscript is still the resolution limit, which is not better than existing pH detection methods.

In the first revision of the manuscript we addressed the issue of the spatial resolution. In the previously revised manuscript, we acknowledged that pH assessment based on surface energy transfer using gold nanoparticles and fluorescence dyes has similar spatial resolution of our method. Nonetheless, the use of this technique for the measurement of extracellular pH on the outer surface of the cells has not yet been exploited and published. In addition, the use of this technique should take advantage of part of the knowledge presented in our paper to effectively attach the pH-sensor to the outer membrane. We amply discussed in the manuscript the method based on low-pH insertion peptides, which has been thoroughly compared to our method. In conclusion, as compared to other techniques that have similar spatial resolution, we would like to remark that our experimental procedure can be implemented in a simple and nimble way, since the cell preparation before Raman analysis requires only a couple of hours. The method was purposely developed using commercially available materials, which are easy to find. In addition to ex-vivo analysis, it has the potential to combine in-vivo cell sorting for diagnostic purpose and phototherapy: in fact, a calibrated increase of power output in the micrometric laser focus induces cell death due to the highly localized heat generated on the gold metal surface. At the completion of the surgical procedure, the nanoparticles attached to the healthy tissue may be washed away, since they are attached to the external membrane without endocytosis and the bonds are cleavable. Obviously, this future potential application of the technique has to be carefully evaluated, developed and tested to prove to be effective. Nowadays, the use of advanced spectrometer for tissue imaging combined to data discrimination by machine learning-based cell classifiers is gaining more and more popularity. Hopefully, such interest will foster the fast improvement and refinement of the technique. In light of these considerations, we hope that the manuscript may be worthy of publication in Nature Communications.

Reviewer #2 (Remarks to the Author):

In the revision, authors carried out more experiments and revised the manuscript carefully to address the reviewer's comments. While the quality of the work has been significantly improved, some discussions need to be careful to avoid misleading.

1. Regarding the answer to the second question, the reviewer would suggest the authors pay attention to the following points. (a) The condition that the 4-MBA SAM is formed. In both refs 33 and 35, the 4-MBA SAMs were formed in AQUEOUS solution under different pH values. No doubt, under alkaline condition in aqueous solution, COOH groups are deprotonated, so FREE 4-MBA molecules can adsorb on Au (Ag) surface via thiol to form S-Au(Ag) bond and via COO- to form COO-Au(Ag) bond. As pointed in ref. 35, under acidic and neutral conditions (in aqueous solution), 4-MBA adsorb on Ag via strong Ag-S bond, while weak COO-Ag and S-Ag in alkaline condition. In this work, the 4-MBA SAM was formed in PBS buffer condition according to the experimental description. So, majority of 4-MBA (if not all) should adsorb on Au surface via strong Au-S bond. In ref. 18, however, the 4-MBA SAM was formed in ethanol solution, so the binding should be Au-S. (b) Once the 4-MBA SAM has been formed via the Au-S bond, all the 4-MBA



molecules have been anchored on the Au surface. In this work, after forming 4-MBA and HPDP-B SAM, “the Au NPs were collected after centrifugation and resuspended in PBS at pH 7.4 for cells treatment or in isotonic buffer solution at different pH for the calibration of the nanosensor (i.e., in the pH range 4 to 10).” So, the COOH group (unbounded) will be protonated or deprotonated in response to the solution / environment pH change. Two possible situations could cause COO-Au interaction even though SAM has been formed: (i) two gold nanoparticles are very close (could be the case in this work since TEM images show Au NP clusters, but this should not be the case when authors did pH calibration in bulk solution), but this is still rare given each NP already has a SAM layer; (ii) multilayer 4-MBA formed in the SAM forming procedure as pointed in ref. 35 (and other people also reported that multilayer instead of monolayer could be formed). In this case, the outer layer 4-MBA molecules that are deprotonated in alkaline condition could diffuse to Au surface and bind via COO-Au bond. Taking these two points into account, the sentences starting with “On the other hand...” in redline on p. 8 lines 256-264 could be misleading. In short, when 4-MBA molecules are free in aqueous solution, under alkaline condition, they can form S-Au and COO-Au bond, but once the SAM has been formed via Au-S, these already bounded molecules have no option to form COO-Au bond even under alkaline condition. The fact of asymmetric peak around  $1400\text{ cm}^{-1}$  was definitely observed in many publications (like ref. 22 as well). It for sure needs more investigation. Nonetheless, the reviewer feels the discussion on p. 8 lines 256-264 could be misleading.

The comment and suggestion from the Reviewer are correct and pertinent. We agree that, once the SAM is formed by thiol adsorption, the variation of pH did not lead to “molecular flip-flop” associated to COO<sup>-</sup> adsorption on the gold surface. In the first revised manuscript, we hypothesized that the SERS intensity of band A at around  $1390\text{ cm}^{-1}$  may be due to S-Au bonded deprotonated molecules in which the carboxylate groups interact with the metal surface. References 33, 35 and 36 of the previously revised manuscript support the intrinsic affinity between carboxylate groups and Au. In case of SAM formed at low pH via COOH adsorption, the symmetric stretching band was observed at  $1370\text{ cm}^{-1}$  (Ref. 36), while in our case the position of band A is at around  $1390\text{ cm}^{-1}$ , namely an intermediate position between adsorbed carboxylates and band B (i.e., free carboxylates of the more vertically oriented 4-MBA molecule). This is the concept that we wanted to articulate at pg. 8, when we stated that “These evidences strongly suggest that in the case of 4-MBA, the SERS intensity at around  $1400\text{ cm}^{-1}$  is due to carboxylates groups differently bound to the metal surface, depending on pH”. In our interpretation, the intensity around  $1400\text{ cm}^{-1}$  is the convolution of bands A and B: both come from S-Au bonded deprotonated 4-MBA, but in band A the molecules are tilted and the COO<sup>-</sup> group may be affected by the gold surface. The following figure shows the SERS intensities collected from AuNP at pH 4.0, 6.4 and 7.4 in the range  $625\text{--}785\text{ cm}^{-1}$ . The intensities were normalized using band C located at  $1068\text{ cm}^{-1}$  ( $\nu_{12}$  ring vibration).

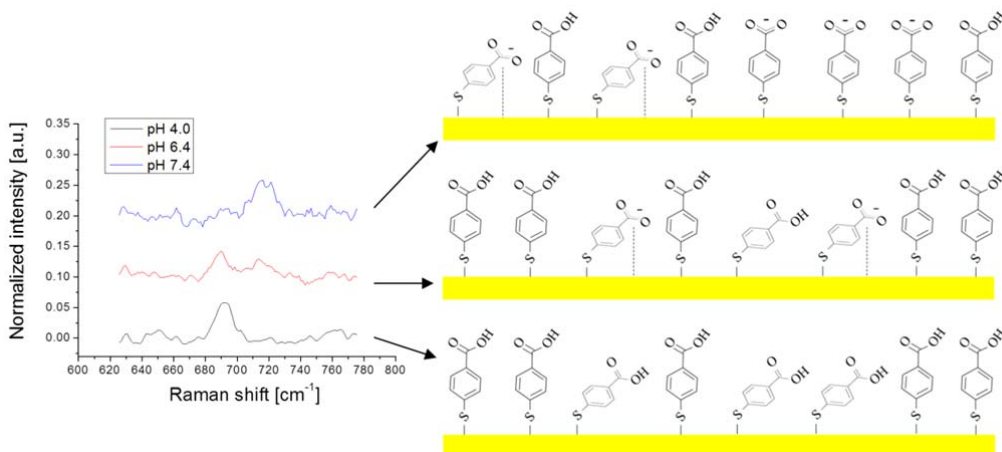

The bands at 694 and 720  $\text{cm}^{-1}$  are assigned to out-of-plane  $\gamma(\text{CCC})$  vibrations in acidic and neutral/alkaline environments, respectively (Phys Chem Chem Phys., 2015;17(39):26093-100. doi: 10.1039/c5cp03844h). From these data, as shown in the explanatory sketches of the figure, we inferred that some 4-MBA molecules of the SAM are tilted toward the gold surface (as also observed in other papers). The reduced distance between the gold surface and the carboxylates of the tilted 4-MBA molecules may explain the interaction causing stretching of the C-O bonds, namely redshift of the Raman frequencies associated to  $\text{COO}^-$  symmetric stretching. Nonetheless, we agree that the conclusive clarification of the origin of band shift and asymmetry requires more investigation. The explanation of the  $\text{COO}^-$  stretching band shift and asymmetry reported in previous studies is based on hydrogen bonding and the possible interaction between  $\text{COO}^-$  groups and the ring hydrogens (Ref. 18, 22 and the new Ref. 35 of the second revised manuscript). This explanation makes sense and it also support the choice of the fitting procedure based on 2 bands, which is the focal point in our paper. Both bands are pH responsive. At acidic pH only Band A is observed and its intensity disappears at highly acidic pH. The latter evidence confirms that in the conjugated AuNP every 4-MBA molecule is pH responsive and there is no adsorption of  $\text{COO}^-$  groups. The separation between band A and B becomes evident as pH rises to the alkaline range. Based on these considerations, we changed the text at the end of pg. 7: we removed the hypothesis of carboxylates-gold interaction and we reported only the intramonolayer hydrogen bonding between adjacent 4-MBA molecules. We removed the previous references 35 and 36. We added a new reference (Ref. 35 in the latest manuscript, Bishnoi, S. W. et al. All-optical nanoscale pH meter. Nano letters 6, 1687-1692 (2006)), which also reports asymmetry and shift of the band due to hydrogen bonding. Again, we thank the Reviewer for noticing this point in our discussion that may have been misleading.

Please note that the sentence “This reaction is favored at alkaline pH (i.e.,  $\text{pH}>9$  in our experiments), where the deprotonated 4-MBA is predominant and, consequently, the population of non-bonded  $-\text{COO}^-$  groups increases along with the probability of plasmon-induced catalytic reaction forming  $\text{CO}_2$  and TP” at pg. 9 of the first revised manuscript was replaced by “This reaction is favored at alkaline pH (i.e.,  $\text{pH}>9$  in our experiments), where the population of deprotonated 4-MBA increases along with the probability of plasmon-induced catalytic reaction forming  $\text{CO}_2$  and TP” at the end of pg. 8 of the second revised manuscript.

Moreover, in line 6 of the paragraph *Outer cell membrane surface labelling* we changed “conjugate via carboxylate- and thiol-gold interactions” to “conjugate via thiol-gold interaction”. In fact, the combination of “conjugate”, “carboxylate” and “interactions” is misleading because the reader may infer that, in our SAM,  $\text{COO}^-$  are adsorbed on the surface.

2. Based on authors’ assignment of 1370  $\text{cm}^{-1}$  peak due to  $\text{COO}-\text{Au}$ , then these  $\text{COO}^-$  are not free, they can’t respond to pH change, then they should not be counted in the intensity ratio ( $I_{\text{A+B}}/I_{\text{C}}$ ) for the calibration curve. Did authors try to plot the calibration curve using  $I_{\text{B}}/I_{\text{C}}$ ?

As stated in the answer to Comment 1, the intensity of band A responds to the variation of pH and it is undetectable at highly acidic pH. It implies that every  $\text{COO}^-$  groups associated to this band are not adsorbed on the gold surface and they can be protonated. The plot of  $I_{\text{B}}/I_{\text{C}}$  is as follows:

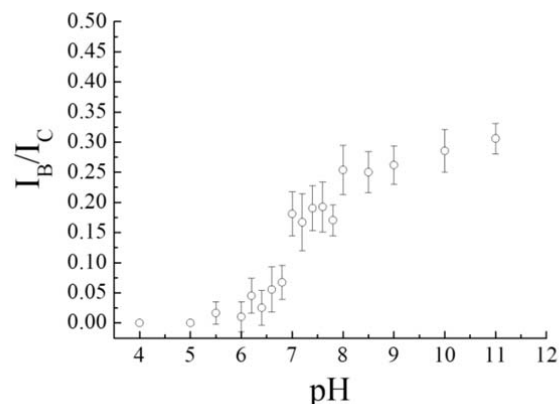

The data still show the typical trend of Henderson–Hasselbalch equation. We can notice a discontinuity at pH approaching 7.0. In fact, at more acidic pH the SERS intensity of the  $\text{COO}^-$  symmetric stretching is prevalently represented by band A.

Reviewer #3 (Remarks to the Author):

In this revised version of the manuscript the authors have performed significant improvements clarifying in a satisfactory way all the main issues pointed out by myself. In this respect they have clarified the important feature concerning the spatial resolution of the pH sensor and have also analysed the relevant reporter molecules that are used for pH estimation as well as performed an estimation of the SERS enhancement factor (lower bound). Therefore, I consider that the main concerns have adequately been answered and the manuscript is now suitable for publication in Nature Communications.

We thank the Reviewer for the positive comments and for her/his contribution throughout the entire revision process.

ADDITIONAL INFORMATION FROM THE AUTHORS:

At pg. 18, paragraph *Statistical analysis*, we changed “non-paired t-test” to “two-tailed unpaired t-test”.

REVIEWERS' COMMENTS:

Reviewer #2 (Remarks to the Author):

In this second revision, authors have addressed my questions and comments in the first round review. I would recommend for publication in Nature Communications.
